# Supplementary material
Source: PubMed Central journal article supplement (PMC1859911)
Supplement: pnas_0606738103_1.pdf [file pnas_0606738103_1.pdf]

470 480 490 500 510 520

DmIhog-Fn1 MYP**P**TP**P**PN**V**TRL**S**DE**S**V**M**LR**W**MVPR**N**D**G**LP**I**V**I**F**K**V**Q**Y**R**M**V**G...KRKN**W**Q**T**T**N**DN**I**P**Y**G

DmBoi-Fn1 MVP**P**SR**P**PN**V**TRL**S**DE**S**V**M**LR**W**SV**P**Q**N**SG**L**Q**I**T**F**F**K**V**Q**Y**R**M**L**GDGKNRRKN**W**Q**T**T**S**DN**I**P**Y**G

hCdo-Fn2 PEAP**D**R**P**T**I**ST**A**SE**T**SV**Y**VT**W**I**P**R**A**NG**G**SP**I**T**A**F**K**V**E**Y**K**R**M**R...**T**S**.**N**W**L**V**A**A**ED**I**P**P**S

hBoc-Fn2 PEAP**D**R**P**T**I**ST**A**SE**T**SV**Y**VT**W**I**P**R**G**NG**G**F**P**I**Q**S**E**R**V**E**Y****K****K**L**K**...**K**V**G**D**W**I**L**A**T**S**A**I**P**P**S**

● ● ●

530 540 550 560

DmIhog-Fn1 .....KPKWNS.....ELG...K**S**F**T**A**S**V**T**D**L**K**P**Q**H**T**Y**R**F**R**I**L**A**V**Y**S**N**N**D**N**K**E

DmBoi-Fn1 NAHGSGPGQGNSHWRRARNRDREYEMGNPPK**N**F**T**S**S**V**T**G**L**T**A**G**K**Y**Y**R**F**R**I**V**A**V**Y**S**N**N**D**N**K**E

hCdo-Fn2 .....K**L**S**V**E**V**R**S**L**E**P**G**S**T****Y**K**F**R**V**I**A**I**N**H**Y**G**E**S**.**

hBoc-Fn2 .....**R**L**S**V**E**I**T**G**L**E**K**G**T**S**Y**K**F**R**V**R**A**L**N**M**L**G**E**S**.**

●
