# Supplementary material
Source: PubMed Central journal article supplement (PMC1859911)

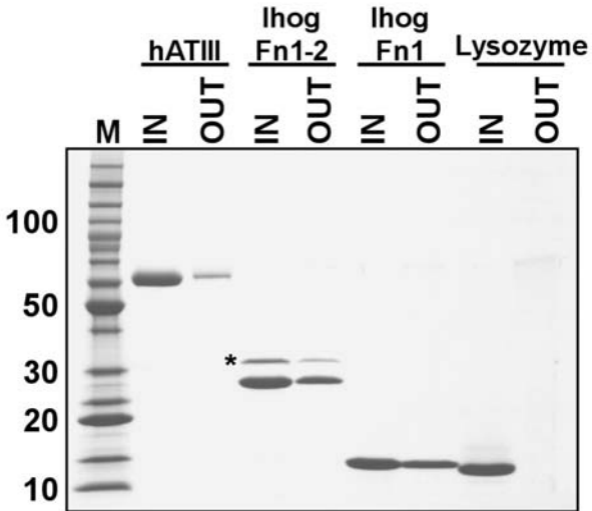

Supplement: pnas_0606738103_2.pdf [file pnas_0606738103_2.pdf]

**A**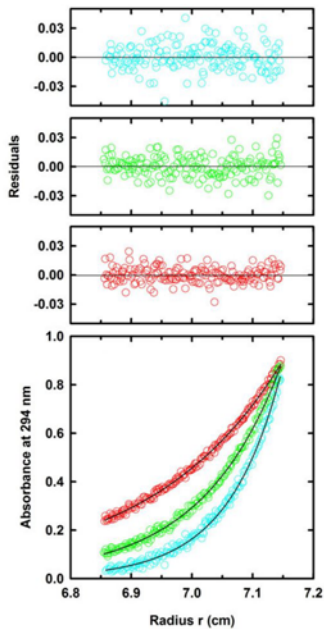**B**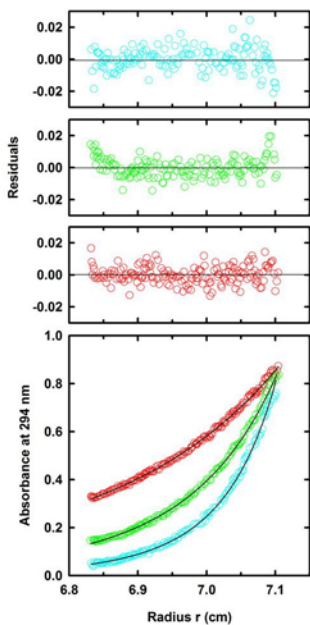**C**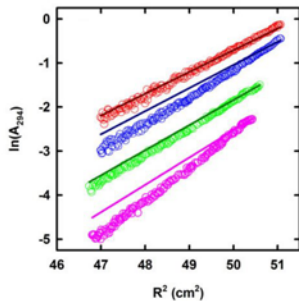**D**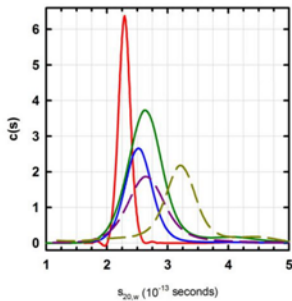

Supplement: pnas_0606738103_3.pdf [file pnas_0606738103_3.pdf]

**A**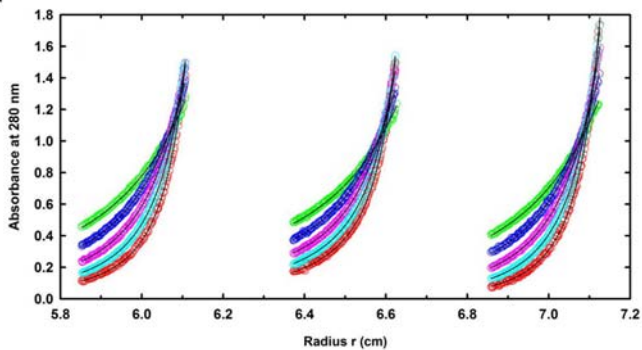**B**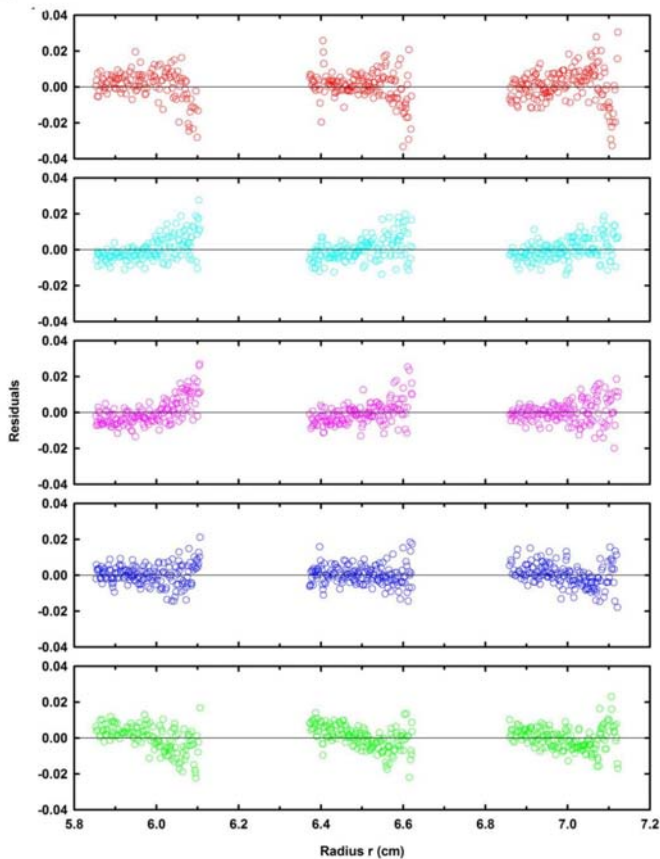

Supplement: pnas_0606738103_4.pdf [file pnas_0606738103_4.pdf]

**A**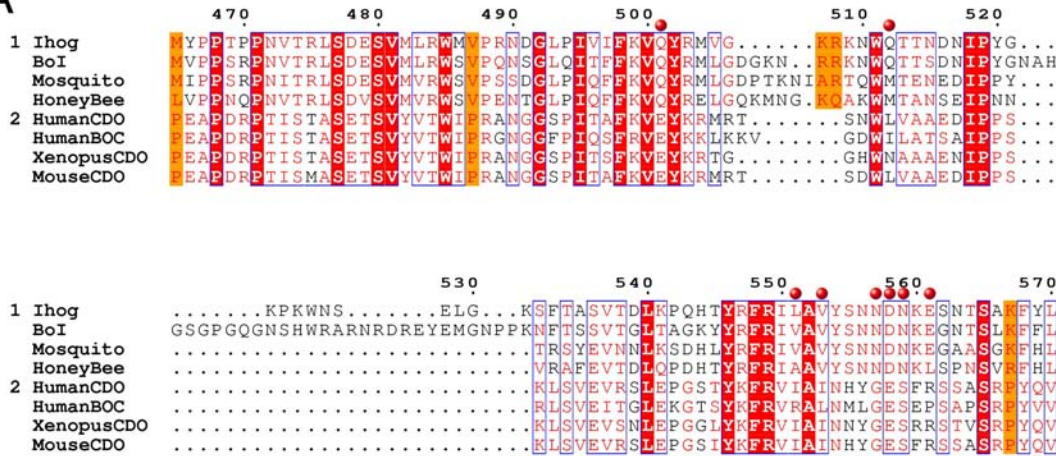**B**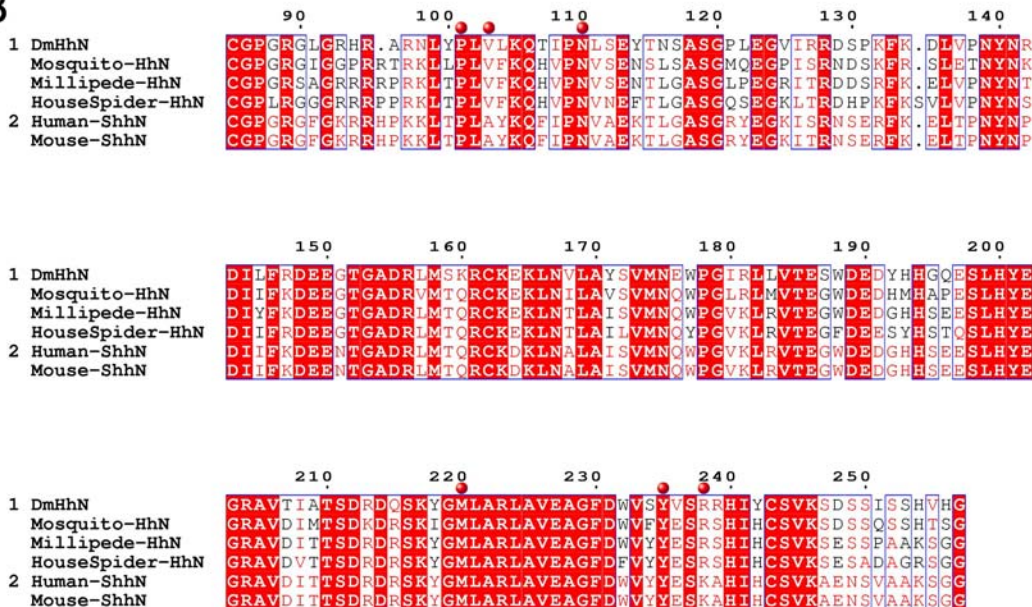

Supplement: pnas_0606738103_5.pdf [file pnas_0606738103_5.pdf]

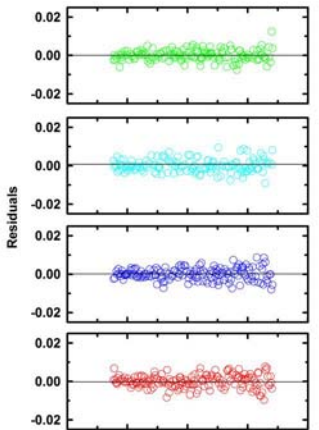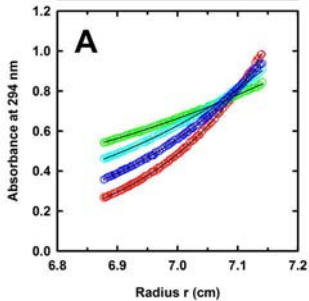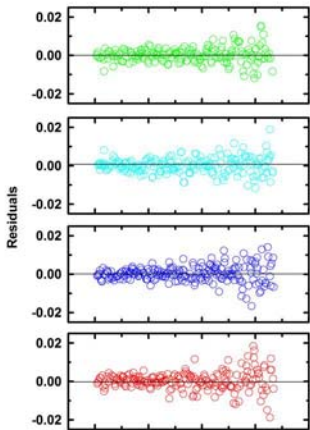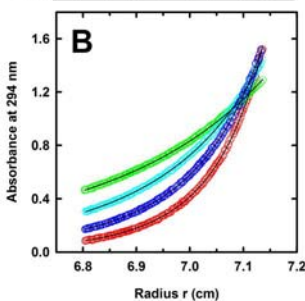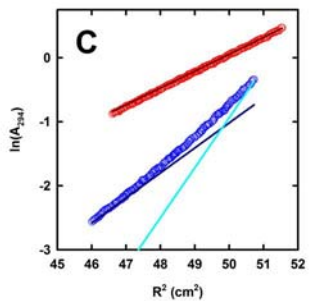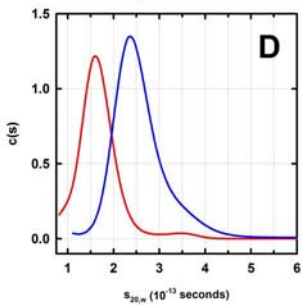

Supplement: pnas_0606738103_6.pdf [file pnas_0606738103_6.pdf]

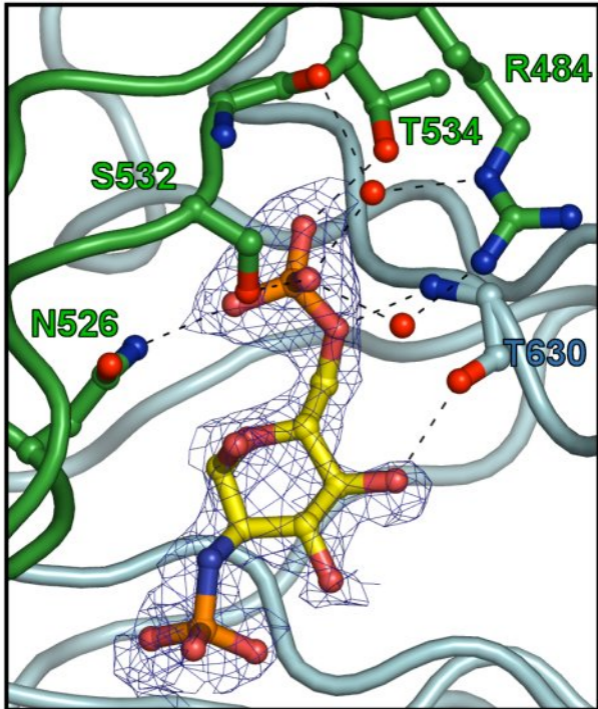

Supplement: pnas_0606738103_7.pdf [file pnas_0606738103_7.pdf]
